1 **Metabolomic profiling reveals effects of marein on energy metabolism in**  
2 **HepG2 cells**

3 Baoping Jiang <sup>1)</sup>, Liang Le <sup>2),3)</sup> #, Keping Hu <sup>1)</sup>, Lijia Xu <sup>1)</sup>, Peigen Xiao <sup>1)</sup> #

4 <sup>1)</sup> Institute of Medicinal Plant Development (IMPLAD), Chinese Academy of  
5 Medical Sciences and Peking Union Medical College, Beijing 100193, China;

6 <sup>2)</sup> Institute of Chinese Materia Medica, China Academy of Chinese Medical  
7 Sciences, Beijing 100700, China;

8 <sup>3)</sup> Post-doctoral Scientific Research Center, China Academy of Chinese  
9 Medical Sciences, Beijing 100700, China;

10 # Corresponding author:

11 Peigen Xiao P [pgxiao@implad.ac.cn](mailto:pgxiao@implad.ac.cn), 151 Malianwa North, Haidian District,  
12 Beijing 100193, China;

13 Liang Le [lifxcy@163.com](mailto:lifxcy@163.com), 151 Malianwa North, Haidian District, Beijing  
14 100193, China

15

16 **Running Head:** Metabolomic profiling reveals effects of marein

17

18

19

20

21

22

23

24

25

26 **Abstract:**

27 Previous studies have suggested that *Coreopsis tinctoria* improves insulin  
28 resistance in rats fed with high-fat diet. But little is known about the  
29 antidiabetic effects of marein which is the main component of *C. tinctoria*. This  
30 study investigated the effects of ethyl acetate extract of *C. tinctoria* (AC) on  
31 insulin resistance (IR) in rats fed a high-fat diet. High glucose and fat  
32 conditions cause a significant increase in blood glucose, insulin, serum TC, TG  
33 and LDL-C, leading to an abnormal IR in rats. However, treatment with AC  
34 protects against HFD-induced IR by improving fasting serum glucose and lipid  
35 homeostasis. High glucose conditions cause a significant decrease in  
36 glycogen synthesis and increases PEPCK and G6Pase protein levels and  
37 Krebs-cycle-related enzymes levels, leading to an abnormal metabolic state in  
38 HepG2 Cells. However, treatment with Marein improves IR by increasing  
39 glucose uptake and glycogen synthesis and by downregulating PEPCK and  
40 G6Pase protein levels. The statistical analysis of HPLC/MS data  
41 demonstrates that Marein restores the normal metabolic state. The results  
42 show that AC ameliorates IR in rats and Marein has the potential effect in  
43 improving IR by ameliorating glucose metabolic disorders.

44 **Keywords:** Metabolomics; Marein; insulin resistance; metabolites; Krebs  
45 cycle

46 **Abbreviations:** AC, ethyl acetate extract of *Coreopsis tinctoria*; TCA,  
47 Tricarboxylic acid; HepG2, hepatocellular carcinoma cell line; 2-NBDG, 2-(N-  
48 (7-nitrobenz-2-oxa-1, 3-diazol-4-yl) amino)-2-deoxyglucose; G6Pase, glucose-

49 6-phosphatase; PEPCK, phosphoenolpyruvate carboxykinase; IR, insulin  
50 resistance; HFD, high-fat diet; SDHA, succinate dehydrogenase flavoprotein  
51 subunit; ACO2, aconitase 2; IDH2, isocitrate dehydrogenase 2; CS, citrate  
52 synthase; FH, fumarate hydratase; MDH2, malate dehydrogenase; DLST,  
53 dihydrolipoamide S-succinyltransferase.

54

## 55 **Introduction**

56 Type 2 diabetes (T2DM) is a progressive disease characterized by  
57 deterioration of glycaemia and escalating therapeutic complexity <sup>[1]</sup>. In  
58 diabetes mellitus, chronic hyperglycemia develops as a consequence of  
59 decreased insulin action from impaired insulin secretion and insulin resistance  
60 (IR) <sup>[2, 3]</sup>. Once chronic hyperglycemia is established, it in turn aggravates IR,  
61 forming a vicious cycle that is collectively called glucose toxicity<sup>[4, 5]</sup>. The liver  
62 is the primary organ responsible for regulating glucose homeostasis <sup>[6]</sup>.  
63 Hepatic IR leads to altered glucose metabolism and hyperglycemia, which is  
64 characterized by the inability of insulin to inhibit hepatic gluconeogenesis by  
65 suppressing unidirectional enzymes, namely, phosphoenolpyruvate  
66 carboxykinase (PEPCK) and glucose 6-phosphatase (G-6Pase)<sup>[7, 8]</sup>. G-6Pase  
67 plays a role in glucose homeostasis <sup>[9]</sup>. PEPCK is a key rate-limiting enzyme  
68 of gluconeogenesis. The activities of G-6Pase and PEPCK are increased  
69 significantly in the liver of diabetic rats <sup>[8]</sup>. Inhibition of G-6Pase and PEPCK  
70 enzymes may interfere with gluconeogenesis and can be useful in treating  
71 diabetic hyperglycemia <sup>[10-13]</sup>. In the liver mitochondrial PEPCK (PEPCK-  
72 M)adjoins its profusely studied cytosolic isoform (PEPCK-C) potentiating  
73 gluconeogenesis and TCA flux, so hepatic PEPCK is required to sustain the

74 Krebs cycle <sup>[14]</sup>. In addition, the Krebs cycle completes the oxidation of  
75 glucose and plays an important role in the glucose metabolism. Therefore,  
76 methods that enable simultaneous measurement of numerous cellular  
77 metabolic intermediates in gluconeogenesis and the Krebs cycle are required  
78 to elucidate the mechanisms of glucose metabolism disorders.

79 Metabolomics is a top-down systems biology approach whereby metabolic  
80 responses to biological interventions or environmental factors are analyzed  
81 and modeled <sup>[15]</sup>. Metabolomics measures perturbations in metabolites  
82 reflecting changes of metabolism caused by environmental factors, and  
83 provides insights into the global metabolic status of the entire organism by  
84 monitoring the entire pattern of low molecular weight compounds rather than  
85 focusing on an individual metabolic intermediate <sup>[16]</sup>. Deregulations of  
86 metabolic processes are expected to be directly or related with relevant  
87 disease end-points, which are represented by the levels of metabolites <sup>[17]</sup>.  
88 Recent longitudinal metabolomic studies have found correlations between  
89 circulating metabolites and prediabetes, future development of IR, or type 2  
90 diabetes in humans. For example, increasing in circulating aromatic amino  
91 acids (AAAs) and branched-chain amino acids (BCAAs) are biomarkers of risk  
92 <sup>[9, 18, 19]</sup>.

93 *Coreopsis tinctoria* Nutt. (Asteraceae), a traditionally used preparation for  
94 diabetes treatment in Portugal <sup>[20, 21]</sup>, is a plant native to North America that  
95 has spread worldwide. Our previous study showed that *C. tinctoria* increases  
96 insulin sensitivity and regulates hepatic metabolism in rats fed a high-fat diet  
97 <sup>[22]</sup>. Since these activities are closely related to metabolic regulation and IR, we  
98 tried to identify the protective effect of ethyl acetate extract of *C. tinctoria* Nutt

99 (AC) on IR, and its possible mechanism of action. Chalcones (okanin and  
100 butein derivatives) are the main constituents of ethyl acetate extract of *C.*  
101 *tinctoria* and among them, identified Marein (okanin-4'-O- $\beta$ -D-  
102 glucopyranoside) as the main metabolite [23]. Marein has many beneficial  
103 biological activities, including antihyperlipidemic [24], antioxidative [25],  
104 antidiabetic [26], and antihypertensive effects [27]. Previous research has also  
105 found that Marein prevented tert-Butyl-Hydroperoxide and cytokine induction  
106 in a mouse insulinoma cell line (MIN6) through the inhibition of the apoptotic  
107 signaling cascade [20]. In addition, Marein promotes pancreatic function  
108 recovery in streptozotocin-induced glucose-intolerant rats [26, 28]. Our previous  
109 studies found that Marein could be the main active compounds of *C. tinctoria*  
110 in improving IR [29]. The protective effects of marein on high glucose-induced  
111 metabolic disorder via IRS1/AKT/AS160 signal pathway in HepG2 cells [30].  
112 These findings focused on *in vivo* anti-diabetic effect led us to further  
113 investigate the underlying mechanism, as to our knowledge no studies on the  
114 mechanisms of metabolic disorder of Marein have been reported, especially  
115 on energy metabolic level.

116 In this study, we employed LC/MS-based metabolomics techniques to  
117 explore the potential targets and mechanisms of Marein for the attenuating IR  
118 and type 2 diabetes. Our study revealed involvement of glucose metabolism  
119 and the Krebs cycle in the protective effects of Marein in a high-glucose and  
120 fat-induced IR model.

121

## 122 **Materials and methods**

### 123 ***Materials***

124 The human liver hepatocellular carcinoma cell line HepG2 was purchased  
125 from the Cell Bank of the Chinese Academy of Sciences (Beijing). Dulbecco's  
126 modified Eagle's medium (DMEM), fetalbovine serum (FBS), and other tissue  
127 culture reagents were purchased from Gibco (Life Technologies, USA). Other  
128 reagents were purchased from Sigma-Aldrich Co. (St. Louis, MO, USA)  
129 unless otherwise indicated. AC was analyzed by HPLC (Waters 2690) with a  
130 diode-array detector (Waters 2487) scanning from 200–600 nm. Ethyl acetate  
131 extract was separated by Shim-pack VP-ODS column (150 × 4.6 mm, 5 μm)  
132 with the optimum condition as described previously<sup>[28, 31]</sup>. Marein was  
133 extracted from *C. tinctoria Nutt.* by our lab. And we also purchased the  
134 compound Marein from Chromadex (00013126-604, California, USA), and the  
135 purities exceeded 99%. Deionized water was used in all experiments. All of  
136 the other chemicals and reagents were of analytical grade. The following  
137 antibodies were used in immunoblotting experiments and at the indicated  
138 dilutions: rabbit polyclonal anti-PCK1 (PEPCK) (ab28455, 1:1000), rabbit  
139 polyclonal anti-G6Pase (ab83690, 1:1000), rabbit monoclonal anti- aconitase  
140 2 (ACO2) (ab129069, 1:10000), rabbit monoclonal anti- malate  
141 dehydrogenase (MDH2) (ab181857, 1:10000), mouse monoclonal anti-  
142 isocitrate dehydrogenase 2 (IDH2) (ab184196, 1:1000), mouse monoclonal  
143 anti- fumarate hydratase (FH) (ab113963, 1:50000), rabbit polyclonal anti-  
144 citrate synthase (CS) (ab96600, 1:1000), mouse monoclonal anti- succinate  
145 dehydrogenase flavoprotein subunit (SDHA) (ab14715, 1:10000), rabbit  
146 monoclonal anti-SDHB (ab178423, 1:5000, abcam, UK), and anti-β-actin  
147 antibody (1:1000, CW0096A, CWBio). Dihydrolipoamide S-  
148 succinyltransferase (DLST)

149 ***Animals and drug treatments.***

150 Sprague Dawley rats were randomly divided into six groups of 10 animals  
151 each. The control group that was given deionized distilled water to drink and  
152 fed standard rat chow 32 composed of 60% vegetable starch, 12% fat, and  
153 28% protein. The high-fat diet (HFD) model group<sup>[32]</sup> that was given deionized  
154 distilled water and fed a high fat diet of 60% fat, 14% protein and 26%  
155 carbohydrate. The metformin group was administrated with 200 mg/kg of  
156 metformin as a positive control by oral gavage and fed a HFD. The rats in the  
157 AC three groups were as follows: low dose of AC (150 mg/kg of body weight +  
158 HFD), middle dose of AC (300 mg/kg of body weight + HFD), high dose of AC  
159 (600 mg/kg of body weight + HFD). The study was approved by the Ethics  
160 Committee of the Institute of Medicinal Plant Development, CAMS&PUMC  
161 (Beijing, China). All experimental procedures were performed in accordance  
162 with relevant guidelines approved by the Ethics Committee of the Institute of  
163 Medicinal Plant Development, CAMS&PUMC.

164

165 ***Cell culture and drug treatment***

166 HepG2 cells were cultured in low glucose DMEM (5.5 mmol/L glucose) that  
167 was supplemented with 10% FBS and 1% antibiotics at 37°C in humidified air  
168 containing 5% CO<sub>2</sub>. Cells in the exponential phase of growth were used in all  
169 of the experiments. HepG2 cells were grown for 3 days and then divided into  
170 different groups for the treatments. The treatment groups (Marein, dissolved  
171 in DMSO, not more than 0.5 percent) were as follows: (1) Control: incubated  
172 in low glucose DMEM for 72 h; (2) High glucose treatment: incubated in  
173 DMEM containing 55 mmol/L glucose for 72 h; (3-6) Marein and glucose

174 treatment: incubated in DMEM containing Marein (40, 20, 10, or 5  $\mu$  mol/L) or  
175 0.5 mmol/L metformin (Positive control ) for 24 h and then incubated in  
176 DMEM containing 55 mmol/L glucose for 72 h. 100 nmol/L insulin was added  
177 into the all treated group for 30 min before all experiments.

#### 178 ***Detection of glucose uptake***

179 Glucose uptake rate was measured by adding 2-(N-(7-nitrobenz-2-oxa-1,  
180 3-diazol-4-yl) amino)-2-deoxyglucose, a fluorescently labeled deoxyglucose  
181 analog (2-NBDG, Cayman Chemical), as a tracer to the culture medium as  
182 previously reported <sup>[33]</sup>. 2-NBDG uptake was then measured after stimulating  
183 the cells for 15 min with  $1 \times 10^{-7}$  mol/L insulin as our previous described<sup>31</sup>. The  
184 cells treated by drugs were then washed twice and incubated with 100  $\mu$ mol/L  
185 of 2-NBDG in glucose-free culture medium for 20 min. The cells cultured in  
186 medium without 2-NBDG were used as a negative control. The cells were  
187 washed twice prior to fluorescence detection using a microplate reader  
188 (Infinite 1000 M, Tecan, AUSTRIA) with fluorescence excitation at 488 nm  
189 and emission detected at 520 nm.

#### 190 ***Determination of ATP, pyruvate and lactate concentrations***

191 The cellular ATP content was detected by using an ATP content kit  
192 (S0026, Beyotime Institute of Biotechnology, China). Briefly, the cell pellets  
193 were collected by centrifugation at 1000  $\times g$  for 5 minutes after digestion with  
194 0.25% trypsin. The homogenate was incubated in boiling water for 30  
195 minutes, and the supernatant was aspirated after centrifugation at 5000  $\times g$  for  
196 10 minutes. An ATP assay kit was used for all of the samples. The results  
197 were analyzed with a luminometer (Fluoroskan Ascent FL, USA).

198 The cellular lactate and pyruvate concentration was detected by using a



199 lactate assay (A019-2, Nan Jing Jian Cheng Bioengineering Institute, Nan  
200 Jing City, China) and pyruvate assay kit (A081, Nan Jing Jian Cheng  
201 Bioengineering Institute, Nan Jing City, China) respectively. Briefly, cell pellets  
202 were collected by centrifugation at 500  $\times g$  for 10 minutes after scraping the  
203 cells with a cell scraper. Cells were washed twice with PBS, then  
204 resuspended in PBS and lysed with a sonicator. The homogenate was  
205 detected using a UV/Visible Spectrophotometer (Lambda 35, Perkin Elmer,  
206 USA).

### 207 ***RNA extraction and quantitative real-time PCR (qPCR)***

208 Cells treated with high glucose or Marein were then collected to isolate  
209 total RNA. Total RNA was reverse transcribed, and *PEPCK*, *G6Pase*, *FH*,  
210 *MDH2*, *SDHA*, *SDHB*, *IDH2*, *ACO2*, *CS* and *GAPDH* gene expression was  
211 measured by QPCR using iCycler thermocycler (BioRad, Hercules, CA) as  
212 previously described<sup>[34]</sup>. The primers of these genes are listed in the Table 1.  
213 All samples were analyzed in triplicate, and the gene expression levels were  
214 normalized to control human *GAPDH* values. The relative expression of  
215 treated samples was normalized to that of untreated cells according to  $\Delta Ct$   
216 analysis.

### 217 ***Western blot analysis***

218 All immunoblots were of the cell lysate with  $1 \times 10^7$  cells per sample with  
219 RIPA cell lysis buffer (50 mM Tris-HCl, pH 7.4, 1% NP-40, 0.5% Na-  
220 deoxycholate, 0.1% SDS, 150 mM NaCl, 2 mM EDTA and 50 mM NaF).  
221 PEPCK and G6Pase were detected with anti-PEPCK and anti-G6Pase  
222 antibodies respectively, both used at a dilution of 1:1000. FH, MDH2, SDHA,  
223 SDHB, ACO2, CS, IDH2 and GAPDH were detected by anti-FH, anti-MDH2,

224 anti-SDHA, anti-SDHB, anti-ACO2, anti-CS, anti-IDH2 and anti-GAPDH for 4h  
225 following the instructions respectively. The secondary antibodies goat anti-  
226 mouse IgG and goat anti-rabbit IgG were peroxidase-conjugated at a dilution  
227 of 1:10000 and 1:20000 respectively. Immune complexes were visualized with  
228 ECL chemiluminescence (GE Healthcare, Little Chalfont, UK). Densitometric  
229 analyses were performed with ImageJ2 software for Microsoft Windows.

### 230 ***Metabolite profiling***

231 Metabolite profiling was performed as previously reported <sup>[35]</sup>. Targeted  
232 metabolomic experiment was analyzed by TSQ Quantiva (Thermo, CA). C18  
233 based reverse phase chromatography was utilized with 10mM tributylamine,  
234 15mM acetic acid in water (pH ~6) and 100% methanol as mobile phase A and  
235 B respectively. This analysis focused on tricarboxylic acid cycle, glycolysis  
236 pathway, pentose phosphate pathway, amino acids and purine metabolism. In  
237 this experiment, we used a 25-minute gradient from 5% to 90% mobile B.  
238 Positive-negative ion switching mode was performed for data acquisition.  
239 Cycle time was set as 1 second and a total of 138 ion pairs were included.  
240 The information of partial ion pairs are listed in Table 2. The resolution for  
241 quartile 1 and quartile 3 are both 0.7FWHM. The source voltage was 3500v  
242 for positive and 2500v for negative ion mode. Sweep gas was turned on at  
243 1(arb) flow rate. In the experiments, metabolites were extracted from  $1 \times 10^7$   
244 HepG2 cells and finally redissolved in 80  $\mu$ l of 80% methanol. One microliter  
245 of sample was loaded for targeted metabolomics analysis. We used specific  
246 sample as quality control (QC) instead of internal standard. Total ion current  
247 and chromatographic patterns were evaluated. And Table 3 shows three  
248 representative compounds in QC runs.

249 **Statistical analysis**

250 The MS raw data of cellular extracts was processed using Thermo  
251 Xcalibur (Thermo, USA). Analyzed spectral data was transformed to contain  
252 aligned peak area with the same mass/retention time pair as well as  
253 normalized peak intensities and sample name. The main parameters for data  
254 processing were set as follows: mass range (80-1200 Da), mass tolerance (5  
255 ppm), intensity threshold (100 counts), retention time (0-20 min) and retention  
256 time tolerance (0.2 min). The resulting data were mean-centered and pareto-  
257 scaled prior to statistical analysis by Principal Component Analysis (PCA) to  
258 differentiate each group. PCA was used to visualize the maximal difference of  
259 global metabolic profiles<sup>[36]</sup>. All data were expressed as means±standard error  
260 of the mean (SEM). Statistical significance was calculated with one-way  
261 ANOVAs and post hoc Turkey's tests in GraphPad Prism 5.0 (GraphPad  
262 Software, San Diego, CA, USA).. Differences were considered to be  
263 statistically significant when  $P < 0.05$ . All experiments were performed at least  
264 four times.

265

266 **Results**

267 ***AC partially improves serum glucose and lipid homeostasis and***  
268 ***protects against HFD-induced IR in HFD-fed rats***

269 To explore the effect of AC in rats, we constructed the animal IR model  
270 induced by high glucose and fat diet. *The results showed that* the serum total  
271 cholesterol (TC) and triglyceride (TG) concentrations were lower than those in  
272 the chow diet-fed animals at the end of the 8-week HFD (Fig. 1A and 1B). The  
273 analysis of serum lipoproteins revealed that the hypercholesterolemia in rats

274 fed a HFD was associated with increased low-density lipoprotein-cholesterol  
275 (LDL-C) and decreased high-density lipoprotein-cholesterol (HDL-C), typical  
276 phenotypes of diabetic dyslipidemia (Fig. 1C and 1D). Treatment with AC for 8  
277 weeks significantly improved the lipid profiles and reduced the serum levels of  
278 glucose and insulin. AC or metformin (MET; 200 mg/kg) significantly reduced  
279 the fasting glucose and insulin levels (Fig. 1E and 1F). Moreover, treatment  
280 with Marein increased insulin sensitivity index and improved the insulin  
281 tolerance (Fig. 1G and 1H). Although, HFD rats showed a clear increase in  
282 body weight, there are no significant changes in drug treated group except  
283 the positive control compared with HFD group. Histological examination of the  
284 liver in HFD-treated rats showed lipid accumulation and fatty degeneration in  
285 the hepatocytes; however, treatment with 100 mg/kg marein significantly  
286 attenuated the formation of fat vacuoles in the liver sections (Fig. 2).

287 ***Marein increases glucose uptake, hexokinase activity, and glycogen***  
288 ***synthesis and decreases RNA and protein expression of PEPCK and***  
289 ***G6Pase in high-glucose-induced IR model cells***

290 We evaluate the effect of marein (Fig. s1) extracted from *C. tinctoria* on  
291 glucose consumption. 55 mmol/L glucose-induced cell model of IR was  
292 successfully constructed with HepG2 cells. Glucose decreased 2-NBDG  
293 uptake in a both time-dependent and dose-dependent manner (Fig. 3A). The  
294 results showed that Marein had a potential effect on promoting the uptake of  
295 glucose into HepG2 cells. The dose-dependent effects of Marein treatment for  
296 24h were investigated from 1.25  $\mu$ mol/L to 40  $\mu$ mol/L. After treatment with 5  
297  $\mu$ mol/L of Marein, the 2-NBDG uptake into HepG2 cells reached the highest  
298 level, which was the plateau level (Fig. 3B). Then, the effect of Marein on IR

299 induced by high glucose was investigated with 2-NBDG. Pre-treatment of  
300 HepG2 cells for 24h with all concentrations of Marein obviously increased  
301 glucose uptake that approach to 90.4% of control with 10  $\mu\text{mol/L}$  Marein  
302 (Fig. 3C), although no significant difference of cell survivals were observed in  
303 HepG2 cells treatment with Marein (Fig. 3D),. We thus selected 10 and 5  
304  $\mu\text{mol/L}$  Marein to use in the subsequent experiments. The IR model with  
305 HepG2 cells (55 mmol/L glucose) causes a decrease in the glycogen content  
306 and hexokinase (a key enzyme in glycogen synthesis) activity. Both  
307 concentrations (5 and 10 $\mu\text{mol/L}$  Marein) inhibited the effect of 55 mmol/L  
308 glucose (Fig. 3E and 3F). Marein can thus increase hexokinase activity and  
309 glycogen synthesis in a dose-dependent manner in an IR model where these  
310 were previously suppressed.

311 In the hepatocyte, PEPCK and G6Pase levels and gluconeogenesis are  
312 stimulated by inhibition of AKT and are restrained by the synthesis of  
313 glycogen in a situation of IR <sup>[37]</sup>. In this study, 55 mmol/L glucose caused an  
314 increase in protein and mRNA levels of PEPCK and G6Pase, but Marein  
315 inhibited these alterations (Fig. 3G-I).

316

317 ***Multivariate statistical analysis of HPLC/MS data summarizes metabolic***  
318 ***differences in treatment groups***

319 Measured levels of small molecule metabolites of enzymes involved in  
320 glucose metabolism and the Krebs cycle are used to verify the changes of  
321 these enzymes. Representative HPLC/MS data of cell samples from the high  
322 glucose treated cells, control cells and Marein-treated group were used in  
323 statistical analysis, as shown in Fig. 4. The three-dimensional PCA score plot

324 for the first three principal components (PC1, PC2 and PC3) with clustering of  
325 each group. The clear separation of the high glucose group and control group  
326 suggests that severe metabolic disturbance occurs in the IR model cells (Fig.  
327 4A, 4B). Marein (5  $\mu\text{mol/L}$  and 10  $\mu\text{mol/L}$ ) group was clearly separated from  
328 the model group (high glucose) and partially overlapped with control group,  
329 suggesting Marein had apparent effect on the IR. The PCA score plots of  
330 PC1, PC2 and PC3 revealed that data points, each representing one sample,  
331 were clustered in a way that allowed Model group (high glucose) to be clearly  
332 separated from control, Marein (10  $\mu\text{mol/L}$ ), Marein (5  $\mu\text{mol/L}$ ) and positive  
333 control groups along PC1 (Fig. 4C, 4D, 4E). Changes in important positions in  
334 a network more strongly impact the pathway than changes occurring in  
335 marginal or relatively isolated positions. MetaboAnalyst 3.0 revealed that  
336 differential metabolite content is important for the normal response to high  
337 glucose group, and multiple pathways are altered in high glucose and Marein  
338 group (Fig. 4F). The impact-value threshold calculated via pathway topology  
339 analysis was set to 0.10 <sup>[38]</sup>, and 27 of the regulated pathways were identified  
340 as potential target pathways (Fig. 4F and Table 4) of marein in high glucose-  
341 induced model.

342 Furthermore, unsupervised hierarchal cluster analysis revealed the  
343 fluctuation of levels across different groups, as visualized by a heat map  
344 (Fig. 5A). Metabolic substrates of different treatment groups were changed in  
345 different degrees. Z-score plots were constructed to identify metabolic  
346 changes distinct between high glucose group and control group. 137  
347 metabolites exclusive to cells after treatment with high glucose (red plot) were  
348 identified. However, treatment with 10  $\mu\text{mol/L}$  Marein significantly reduced the

349 levels of these metabolites (green plot, Fig. 5B).

350

351 ***Effects of Marein on energy metabolism intermediates in high glucose-***  
352 ***induced IR model cells.***

353 High glucose-treated cells exhibited changes in the levels of metabolic  
354 intermediates that participate in energy metabolism, including the glycolytic  
355 pathway and the Krebs cycle. Concentrations of major intermediates involved  
356 in glycolysis, such as dihydroxyacetone phosphate (DHAP; 0.48-fold,  $p=$   
357  $8 \times 10^{-3}$ ), and 3-phosphoglycerate (0.61-fold,  $p= 0.04$ ), were significantly  
358 decreased in the high glucose group, compared with control group. However,  
359 10  $\mu\text{mol/L}$  Marein reduced the effect of high glucose on these two metabolites  
360 (Fig. 6).

361 The high glucose condition clearly increased levels of other measured  
362 Krebs cycle intermediates compared with control group, including citrate  
363 (5.09-fold,  $p= 1.5 \times 10^{-7}$ ), succinate (6.46-fold,  $p= 1.7 \times 10^{-4}$ ), aconitate (3.11-  
364 fold,  $p= 5.2 \times 10^{-6}$ ), and malate (4.08-fold,  $p= 8.8 \times 10^{-6}$ ). 10  $\mu\text{mol/L}$  and 5  $\mu\text{mol/L}$   
365 Marein partially decreased the effect of high glucose on these Krebs cycle  
366 intermediates.

367 ***Marein reduces mRNA and protein expression of Krebs related enzymes***  
368 ***SDHA, ACO2, IDH2 and CS in high-glucose-induced IR model cells.***

369 To evaluate the effect of Marein on Krebs cycle metabolism of human  
370 hepatocyte exposed to high glucose, the RNA and protein expression of  
371 Krebs related enzymes were detected with qPCR and western blot assays. As  
372 shown in figure 7A, treatment with 55 mmol/L glucose caused to an increase  
373 of some Krebs cycle mRNA levels, including *SDHA*, *ACO2*, *IDH2* and *CS*,

374 whereas this effect was inhibited by Marein. There were no detectable  
375 differences in mRNA levels of *FH*, *MDH2* and *DLST* in the high-glucose-  
376 induced IR model cells. In accordance with the results of mRNA expression,  
377 the protein levels of SDHA, ACO2, IDH2 and CS were also increased in the  
378 treatment group with 55 mmol/L glucose, but FH, MDH2 and SDHB were not  
379 altered. Marein reduced the effect of high glucose on the protein expression of  
380 SDHA, ACO2, IDH2 and CS in a dose-dependent manner (Fig. 7B and 7C).

381 ***Marein reduces ATP levels, pyruvate and lactate concentration in high***  
382 ***glucose-induced IR model cells.***

383 As exposure to high glucose will decrease glycogen synthesis, the effect of  
384 high glucose on gluconeogenesis was evaluated by detecting the pyruvate  
385 and lactate concentration and ATP levels. Under the IR condition, cells  
386 produced more ATP to supply energy due to a decline in glucose uptake.  
387 Treatment with high glucose also caused the elevation of pyruvate and lactate  
388 concentration, whereas this was inhibited by 10 and 5  $\mu\text{mol/L}$  Marein (Fig. 7D-  
389 F). This result indicates that increased gluconeogenesis plays a key role in  
390 the damage caused by high glucose in HepG2 cells, and that Marein can  
391 ameliorate that effect.

392 **Discussion**

393 Previous study showed that the flower tea *C. tinctoria* increases insulin  
394 sensitivity and regulates hepatic metabolism in rats fed a high-fat diet<sup>[22]</sup>. In  
395 this study, it had been showed that AC strongly improves glucose and lipid  
396 homeostasis disrupted by HFD in rats. As the main components of AC, Marein  
397 protects HepG2 cells from high glucose-induced glucose metabolism disorder.  
398 Metabolomics analyses showed that Marein improves the multitude metabolic



399 pathway including TCA cycle, gluconeogenesis and amino acid metabolism in  
400 HepG2 cells. Our results demonstrate that pretreatment of HepG2 cells with  
401 Marein significantly reversed high glucose-induced the changes of the key  
402 substrates and enzymes in gluconeogenesis and Krebs cycle.

403 The liver plays an important role in maintaining blood glucose  
404 concentration both by supplying glucose to the circulation via glycogenolysis  
405 and gluconeogenesis and by removing glucose from the circulation to  
406 increase glycogen synthesis <sup>[37]</sup>. We found that glucose utilization and  
407 glycogen synthesis were significantly decreased but the activity of PEPCK  
408 and G6Pase, the key enzymes in the metabolic pathway of gluconeogenesis  
409 were obviously increased in cells treated with high glucose (Fig. 3). These  
410 results are in agreement with the previous findings that hepatic IR can be  
411 attributed mostly to decreased stimulation of glycogen synthesis by insulin  
412 while gluconeogenesis is abnormally enhanced due to the inefficient utility of  
413 glucose <sup>[39]</sup>. Our data showing that pretreatment with Marein significantly  
414 reversed the high-glucose-induced decrease in glucose utilization and  
415 glycogen synthesis, increasing in the activity of PEPCK and G6Pase.  
416 Consistent with the protein expression of gluconeogenesis enzymes, the  
417 metabolites of glycolytic and gluconeogenesis pathway were significantly  
418 decreased in the high glucose group (Fig.. 3G), which could be reversed by  
419 pretreatment with Marein. In accordance with previous reports, pyruvate and  
420 lactate were clearly increased in the high glucose treatment cells <sup>[40, 41]</sup>. These  
421 metabolites were the end product of glycolysis, thus their levels elevated in  
422 response to an increased glycolytic activity. This is different from the liver  
423 tissues with type 2 diabetes <sup>[42]</sup>. One possible explanation for these results is

424 that HepG2 cell is a kind of tumor cell line with a high rate of aerobic  
425 glycolysis, known as the Warburg effect, which is a hallmark of cancer cell  
426 glucose metabolism <sup>[43]</sup>. Our results demonstrated that pretreatment with  
427 Marein before high glucose treatment significantly reduced the high glucose-  
428 induced increase in pyruvate and lactate generation and decrease in  
429 glycolytic activity in HepG2 cells. It is widely accepted that pyruvate is  
430 converted to acetyl-CoA and then enter the Krebs cycle in the mitochondria.  
431 Previous reports have demonstrated that the key enzyme activities of the  
432 Krebs cycle are significantly altered in type 2 diabetes <sup>[35, 44, 45]</sup>.

433 In this study, mRNA expression and protein levels of these enzymes  
434 were measured, and it was found that treatment with high glucose caused  
435 an increase in mRNA and protein levels of some key enzymes including  
436 ACO2, IDH2, CS and SDHA, and affected upstream reactions of the Krebs  
437 cycle, findings which are in agreement with the previous findings that are  
438 mostly focused on the key enzymes activities of Krebs cycle <sup>[35, 44, 45]</sup>. The  
439 high-glucose condition did not affect the enzymes downstream of the Krebs  
440 cycle, such as FH and MDH2. *SDHB* gene expression was not affected by  
441 high glucose, which may be because SDHB is not the catalyzing subunit  
442 (Fig. 7). However over-activation of these enzymes as induced by high  
443 glucose may be suppressed by pretreatment with Marein.

444 A recent report by Choi et al. <sup>[46]</sup> implicates glucolipototoxicity as a cause for  
445 impaired glucose metabolism, leading to a decrease in Krebs cycle  
446 intermediates that is consistent with our current findings that the levels of  
447 Krebs cycle intermediates, such as succinate, citrate, aconitate, and malate  
448 are significantly increased in the high glucose group. On the other hand,

449 pretreatment with Marein before high glucose significantly increased the  
450 above Krebs cycle intermediates, which suggested that Marein could  
451 significantly increase the rate of the Krebs cycle and the accumulation of  
452 these intermediates, and thus reduce the toxicity of glucose. However, our  
453 study also found that mRNA and protein levels of Krebs cycle-related  
454 enzymes, such as SDHA, CS, ACO2 and IDH2, significantly increased in high  
455 glucose group and decreased in Marein pretreatment group, which may  
456 reverse the stress response to these substrates. The increase in these  
457 enzymes may degrade the related substrates.

458 In summary, we evaluated the effect of marein extracted from on IR. And  
459 then we have demonstrated that Marein attenuated the IR induced by high  
460 glucose in vitro. Our results show that Marein's improvement of the IR effect  
461 can be attributed to it ameliorating numerous high glucose-induced processes  
462 such as decrease in glucose uptake and glycogen synthesis, inhibition the  
463 activity of hexokinase, perturbation of the glyconeogenesis and Krebs cycle  
464 homeostasis, and an increase in the levels of ATP, pyruvate and lactate.  
465 Meanwhile, Marein also improves glucose and lipid metabolism disorder  
466 disrupted by HFD in rat IR model. These findings suggest that Marein may  
467 have considerable potential for preventing high glucose-induced glucose  
468 metabolism disorder and IR.

#### 469 **Acknowledgements**

470 The work was supported by grants from the National Natural Science  
471 Foundation of China (8010907, 81271255 and 81274188), 973 Program  
472 (2013CB531200), the Program for Changjiang Scholars and Innovative  
473 Research Team (IRT1150). China HiTech 863 Program (2012AA020205,

474 2014AA020906), Instrumentation Program of Ministry of Science and  
475 Technology of China (2012YQ18011710), Young Scientist Grant from Peking  
476 Union Medical College (2012J22), CAMS Innovation Fund for Medical  
477 Sciences (CIFMS 2016-I2M-1-012).

478

479 **Conflict of Interest:** We wish to confirm that there are no known conflicts of  
480 interest associated with this publication and there has been no significant  
481 financial support for this work that could have influenced its outcome.

482 **Author Contributions:**

483 Conceptualization: G,Xiao.

484 Data curation: B,Jiang.

485 Formal analysis: LLe.

486 Investigation: B,Jiang.

487 Methodology: LLe.

488 Project administration: L, Xu K,Hu

489 Resources: L, Xu.

490 Software: B,Jiang.

491 Supervision: G,Xiao.

492 Validation: G,Xiao.

493 Visualization: L, Xu K,Hu.

494 Writing – original draft: LLe B,Jiang.

495 Writing – review & editing: LLe B,Jiang.

496

497 **References:**

498

499 1. Pozzilli P, Leslie RD, Chan J, et al. The A1C and ABCD of glycaemia management in type 2  
500 diabetes: a physician's personalized approach. *Diabetes Metab Res Rev*, 2010, **26 (4)**: 239-

- 501 244.
- 502 2. Matsuoka T, Kajimoto Y, Watada H, et al. Glycation-dependent, reactive oxygen species-
- 503 mediated suppression of the insulin gene promoter activity in HIT cells. *J Clin Invest*, 1997, **99**
- 504 **(1)**: 144-150.
- 505 3. Abdul-Ghani MA, Williams K, DeFronzo RA, et al. What is the best predictor of future type 2
- 506 diabetes? *Diabetes Care*, 2007, **30 (6)**: 1544-1548.
- 507 4. Rossetti L. Glucose toxicity: the implications of hyperglycemia in the pathophysiology of
- 508 diabetes mellitus. *Clin Invest Med*, 1995, **18 (4)**: 255-260.
- 509 5. Copeland RJ, Bullen JW, and Hart GW. Cross-talk between GlcNAcylation and
- 510 phosphorylation: roles in insulin resistance and glucose toxicity. *Am J Physiol Endocrinol*
- 511 *Metab*, 2008, **295 (1)**: E17-28.
- 512 6. Konig M, Bulik S, and Holzthutter HG. Quantifying the contribution of the liver to glucose
- 513 homeostasis: a detailed kinetic model of human hepatic glucose metabolism. *PLoS Comput*
- 514 *Biol*, 2012, **8 (6)**: e1002577.
- 515 7. Frantz ED, Penna-de-Carvalho A, Batista Tde M, et al., *Comparative effects of the renin-*
- 516 *angiotensin system blockers on nonalcoholic fatty liver disease and insulin resistance in*
- 517 *C57BL/6 mice*, in *Metab Syndr Relat Disord*. 2014. p. 191-201.
- 518 8. Wang J, Liu B, Han H, et al. Acute hepatic insulin resistance contributes to hyperglycemia in
- 519 rats following myocardial infarction. *Mol Med*, 2015.
- 520 9. Ferrannini E, Natali A, Camastra S, et al. Early metabolic markers of the development of
- 521 dysglycemia and type 2 diabetes and their physiological significance. *Diabetes*, 2013, **62 (5)**:
- 522 1730-1737.
- 523 10. Zhou J, Xu G, Yan J, et al. *Rehmannia glutinosa* (Gaertn.) DC. polysaccharide ameliorates
- 524 hyperglycemia, hyperlipemia and vascular inflammation in streptozotocin-induced diabetic
- 525 mice. *J Ethnopharmacol*, 2015, **164**: 229-238.
- 526 11. Wang C, Chen Z, Li S, et al. Hepatic overexpression of ATP synthase beta subunit activates
- 527 PI3K/Akt pathway to ameliorate hyperglycemia of diabetic mice. *Diabetes*, 2014, **63 (3)**: 947-
- 528 959.
- 529 12. Lee YS, Lee EK, Oh HH, et al. Sodium meta-arsenite ameliorates hyperglycemia in obese
- 530 diabetic db/db mice by inhibition of hepatic gluconeogenesis. *J Diabetes Res*, 2014, **2014**:
- 531 961732.
- 532 13. Cnop M, Vidal J, Hull RL, et al. Progressive loss of beta-cell function leads to worsening
- 533 glucose tolerance in first-degree relatives of subjects with type 2 diabetes. *Diabetes Care*,
- 534 2007, **30 (3)**: 677-682.
- 535 14. Mendez-Lucas A, Hyrossova P, Novellademunt L, et al. Mitochondrial phosphoenolpyruvate
- 536 carboxykinase (PEPCK-M) is a pro-survival, endoplasmic reticulum (ER) stress response gene
- 537 involved in tumor cell adaptation to nutrient availability. *J Biol Chem*, 2014, **289 (32)**: 22090-
- 538 22102.
- 539 15. Nicholson JK, Connelly J, Lindon JC, et al. Metabonomics: a platform for studying drug toxicity
- 540 and gene function. *Nat Rev Drug Discov*, 2002, **1 (2)**: 153-161.
- 541 16. Suhre K. Metabolic profiling in diabetes. *J Endocrinol*, 2014, **221 (3)**: R75-85.
- 542 17. Kim K, Aronov P, Zakharkin SO, et al. Urine metabolomics analysis for kidney cancer detection
- 543 and biomarker discovery. *Mol Cell Proteomics*, 2009, **8 (3)**: 558-570.
- 544 18. Cheng S, Rhee EP, Larson MG, et al. Metabolite profiling identifies pathways associated with
- 545 metabolic risk in humans. *Circulation*, 2012, **125 (18)**: 2222-2231.
- 546 19. Floegel A, Stefan N, Yu Z, et al. Identification of serum metabolites associated with risk of
- 547 type 2 diabetes using a targeted metabolomic approach. *Diabetes*, 2013, **62 (2)**: 639-648.
- 548 20. Dias T, Liu B, Jones P, et al. Cytoprotective effect of *Coreopsis tinctoria* extracts and flavonoids
- 549 on tBHP and cytokine-induced cell injury in pancreatic MIN6 cells. *J Ethnopharmacol*, 2012,
- 550 **139 (2)**: 485-492.
- 551 21. Srere PA. Isotope studies on citrate-condensing enzyme. *Adv Tracer Methodol*, 1966, **3**: 199-
- 552 209.
- 553 22. Jiang B, Le L, Wan W, et al. The Flower Tea *Coreopsis tinctoria* Increases Insulin Sensitivity and
- 554 Regulates Hepatic Metabolism in Rats Fed a High-Fat Diet. *Endocrinology*, 2015, **156 (6)**:
- 555 2006-2018.
- 556 23. Zhang Y SS, Zhao M, Jiang Y, Tu P. . A novel chalcone from *Coreopsis tinctoria* Nutt. *Biochem*
- 557 *Syst Ecol* 2006, **34: (766–769).**

- 558 24. Liang SH, Pang SB, Liu XY, et al. Laboratory study of *Coreopsis* extracts on reducing blood lipid  
559 in hyperlipimia model mice. *Journal of Nongken Medicine* 2009, **31**: 495-498.
- 560 25. Lan S, Lin J, and Zheng N. Evaluation of the antioxidant activity of *coreopsis tinctoria* nuff. And  
561 optimisation of isolation by response surface methodology. *Acta Pharm*, 2014, **64 (3)**: 369-  
562 378.
- 563 26. Dias T, Mota-Filipe H, Liu B, et al. Recovery of oral glucose tolerance by Wistar rats after  
564 treatment with *Coreopsis tinctoria* infusion. *Phytother Res*, 2010, **24 (5)**: 699-705.
- 565 27. Ming T, Sun HY, Hu MY, et al. Experimental study on antihypertension and in vivo antioxidant  
566 function of *Coreopsis* extract. *Chinese Journal of Experimental Traditional Medical Formulae*  
567 2012, **18**: 249-252.
- 568 28. Dias T, Bronze MR, Houghton PJ, et al. The flavonoid-rich fraction of *Coreopsis tinctoria*  
569 promotes glucose tolerance regain through pancreatic function recovery in streptozotocin-  
570 induced glucose-intolerant rats. *J Ethnopharmacol*, 2010, **132 (2)**: 483-490.
- 571 29. Jiang BP, Le L, Yao X, et al. Establishment of Insulin Resistance HepG2 Cell Model and Its  
572 Application in Screening Bioactive Components of *Coreopsis tinctoria*. *Mod Chin Med*, 2017,  
573 **19**: 165-173.
- 574 30. Jiang B, Le L, Zhai W, et al. Protective effects of marein on high glucose-induced glucose  
575 metabolic disorder in HepG2 cells. *Phytomedicine*, 2016, **23 (9)**: 891-900.
- 576 31. Srere PA and Foster DW. On the proposed relation of citrate enzymes to fatty acid synthesis  
577 and ketosis in starvation. *Biochem Biophys Res Commun*, 1967, **26 (5)**: 556-561.
- 578 32. Iizuka K, Bruick RK, Liang G, et al. Deficiency of carbohydrate response element-binding  
579 protein (ChREBP) reduces lipogenesis as well as glycolysis. *Proc Natl Acad Sci U S A*, 2004, **101**  
580 **(19)**: 7281-7286.
- 581 33. Yoshioka K, Saito M, Oh KB, et al. Intracellular fate of 2-NBDG, a fluorescent probe for glucose  
582 uptake activity, in *Escherichia coli* cells. *Biosci Biotechnol Biochem*, 1996, **60 (11)**: 1899-1901.
- 583 34. MacDonald MJ, Brown LJ, Longacre MJ, et al. Knockdown of both mitochondrial isocitrate  
584 dehydrogenase enzymes in pancreatic beta cells inhibits insulin secretion. *Biochim Biophys*  
585 *Acta*, 2013, **1830 (11)**: 5104-5111.
- 586 35. Yuan M, Breitkopf SB, Yang X, et al. A positive/negative ion-switching, targeted mass  
587 spectrometry-based metabolomics platform for bodily fluids, cells, and fresh and fixed tissue.  
588 *Nat Protoc*, 2012, **7 (5)**: 872-881.
- 589 36. Srere PA. A magnetic resonance study of the citrate synthase reaction. *Biochem Biophys Res*  
590 *Commun*, 1967, **26 (5)**: 609-614.
- 591 37. Klover PJ and Mooney RA. Hepatocytes: critical for glucose homeostasis. *Int J Biochem Cell*  
592 *Biol*, 2004, **36 (5)**: 753-758.
- 593 38. Wang W, Cote J, Xue Y, et al. Purification and biochemical heterogeneity of the mammalian  
594 SWI-SNF complex. *EMBO J*, 1996, **15 (19)**: 5370-5382.
- 595 39. Cline GW, Petersen KF, Krssak M, et al. Impaired glucose transport as a cause of decreased  
596 insulin-stimulated muscle glycogen synthesis in type 2 diabetes. *N Engl J Med*, 1999, **341 (4)**:  
597 240-246.
- 598 40. Iyer VV, Yang H, Ierapetritou MG, et al. Effects of glucose and insulin on HepG2-C3A cell  
599 metabolism. *Biotechnol Bioeng*, 2010, **107 (2)**: 347-356.
- 600 41. Nibourg GA, Huisman MT, van der Hoeven TV, et al. Stable overexpression of pregnane X  
601 receptor in HepG2 cells increases its potential for bioartificial liver application. *Liver Transpl*,  
602 2010, **16 (9)**: 1075-1085.
- 603 42. Tian N, Wang JS, Wang PR, et al. NMR-based metabolomic study of Chinese medicine Gegen  
604 Qinlian Decoction as an effective treatment for type 2 diabetes in rats. *Metabolomics*, 2013, **9**  
605 **(6)**: 1228-1242.
- 606 43. Byun JK, Choi YK, Kang YN, et al. Retinoic acid-related orphan receptor alpha reprograms  
607 glucose metabolism in glutamine-deficient hepatoma cells. *Hepatology*, 2015, **63 (3)**: 953-  
608 964.
- 609 44. Ortenblad N, Mogensen M, Petersen I, et al. Reduced insulin-mediated citrate synthase  
610 activity in cultured skeletal muscle cells from patients with type 2 diabetes: evidence for an  
611 intrinsic oxidative enzyme defect. *Biochim Biophys Acta*, 2005, **1741 (1-2)**: 206-214.
- 612 45. Ishii N, Carmines PK, Yokoba M, et al. Angiotensin-converting enzyme inhibition curbs  
613 tyrosine nitration of mitochondrial proteins in the renal cortex during the early stage of  
614 diabetes mellitus in rats. *Clin Sci (Lond)*, 2013, **124 (8)**: 543-552.

615 46. Choi SE, Lee YJ, Hwang GS, et al. Supplement of TCA cycle intermediates protects against high  
616 glucose/palmitate-induced INS-1 beta cell death. Arch Biochem Biophys, 2011, **505 (2)**: 231-  
617 241.  
618  
619

620

## 621 **Figures and Legends**

622

623 **Figure 1** AC improves serum glucose and lipid homeostasis and protects  
624 against HFD-induced IR. The serum levels of TC (A), TG (B), LDL-C (C),  
625 HDL-C (D), fasting blood glucose (E), fasting insulin (F) were measured. G,  
626 Insulin sensitivity index [ISI =1/(fasting insulin × fasting plasma glucose)]. H,  
627 insulin tolerance tests (ITT). I, body weight Values are the means ± SEM (n =  
628 10). .\*  $P<0.05$  vs the control group; \*\*  $P<0.01$  vs the control group; #  $P<0.05$   
629 vs HFD-treated group; ##  $P<0.01$  vs HFD-treated group.

630

631 **Figure 2** Effects of AC on lipid accumulation and steatosis. Representative  
632 hematoxylin and eosin staining of the liver (magnifications, ×200).

633

634 **Figure 3** Marein inhibits the decrease of glucose uptake and the imbalance of  
635 glucose metabolism induced by high glucose in HepG2 cells. (A) Dose-  
636 dependent and time-dependent effect of glucose on 2-NBDG uptake. (B)  
637 Dose-dependent effect of Marein on 2-NBDG uptake. HepG2 cells were  
638 incubated for 24h. (C) Glucose uptake expressed as a percent of control  
639 group are means ± SD of at least 4 different samples per condition. (D) Cell  
640 viability shows the toxicological effect of Marein in HepG2 cells. (E) Effect of  
641 Marein on glycogen content. (F) Effect of Marein on Hexokinase activity. (G)

642 Bands of representative experiments for PEPCK and G6Pase. (H)  
643 Densitometric quantification of PEPCK and G6Pase. (I) Effect of Marein on  
644 mRNA expression of PEPCK and G6Pase. All experiments were performed at  
645 least 4 times. \*  $P < 0.05$  vs the control group; \*\*  $P < 0.01$  vs the control group; \*\*\*  
646  $P < 0.001$  vs the control group; #  $P < 0.05$  vs 55 mmol/L glucose-treated group;  
647 ##  $P < 0.01$  vs 55 mmol/L glucose-treated group.

648

649 **Figure 4** PCA scores plots for HPLC/MS data of all groups. (A) The three-  
650 dimensional PCA score plot of metabolic states of normal control group (red  
651 ●), high glucose group (green ●), 10  $\mu\text{mol/L}$  Marein group (blue ●), 5  $\mu\text{mol/L}$   
652 Marein group (bright blue ●) and Positive control group (pink ●). (B) The  
653 three-dimensional PCA score plot of metabolic states of normal control group  
654 (red ●) and high glucose group (green ●). (C) The three-dimensional PCA  
655 score plot of metabolic states of high glucose group (red ●) and Positive  
656 control group (green ●). (D) The three-dimensional PCA score plot of  
657 metabolic state of high glucose group (red ●) and 5  $\mu\text{mol/L}$  Marein group  
658 (green ●). (E) The three-dimensional PCA score plot of metabolic state of  
659 high glucose group (red ●) and 10  $\mu\text{mol/L}$  Marein group (green ●). (F)  
660 Summary of pathway analysis with MetPA. Positive control is 0.5 mmol/L  
661 metformin.

662

663 **Figure 5** The variance analysis of metabolites based on the data of HPLC/MS  
664 of cells. (A) Heat map visualization of the correlation analysis of all  
665 metabolites. Row: groups (red: normal control; green: high glucose; blue: 10  
666  $\mu\text{mol/L}$  Marein; bright blue: 5  $\mu\text{mol/L}$  Marein; pink: Positive control); columns:



667 metabolites; Cell color key indicates the cluster score, green: Lowest, red:  
668 highest. (B) High glucose-based z-score plot of named metabolites for  
669 comparison between normal control (black), high glucose (red) and 10  $\mu\text{mol/L}$   
670 Marein (green). Data are shown as standard deviation from the mean of  
671 respective sham. Each dot represents a single metabolite in 1 sample;  $n=4$   
672 per group.

673

674 **Figure 6** Metabolome pathway map of quantified metabolites, including  
675 components of the glycolytic or gluconeogenesis pathway and Krebs cycle in  
676 all groups. The red box shows the enzymes increased by high glucose  
677 treatment. \* $P<0.05$  vs the control group; \*\*  $P<0.01$  vs the control group;\*\*\*  
678  $P<0.001$  vs the control group; #  $P<0.05$  vs 55 mmol/L glucose-treated group;  
679 ##  $P<0.01$  vs 55 mmol/L glucose-treated group. F6P, Fructose 6-phosphate;  
680 F1,6P, Fructose 1,6-bisphosphate; DHAP, Dihydroxyacetone phosphate; PEP,  
681 Phosphoenolpyruvate;

682

683 **Figure 7** Marein inhibits the increase of mRNA expression and protein levels  
684 of Krebs cycle enzymes induced by high glucose in HepG2 cells. (A)Effect of  
685 Marein on mRNA expression of Krebs cycle genes. (B) Bands of  
686 representative experiments for FH, MDH2, SDHA, SDHB, IDH2, ACO2 and  
687 CS. (C) Densitometric quantification of Krebs cycle enzymes. (D) ATP levels  
688 expressed as a percent of control group are means  $\pm$  SD of at least 4 different  
689 samples per condition. (E) Effect of Marein on pyruvate concentration. (F)  
690 Lactate concentrations expressed as a percent of control group are means  $\pm$   
691 SD of at least 4 different samples per condition.\*  $P<0.05$  vs the control group;

692 \*\*  $P < 0.01$  vs the control group; #  $P < 0.05$  vs 55 mmol/L glucose-treated group;

693 ##  $P < 0.01$  vs 55 mmol/L glucose-treated group.

694

695

**A**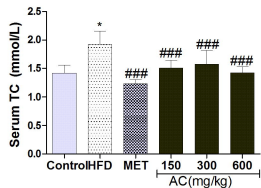**B**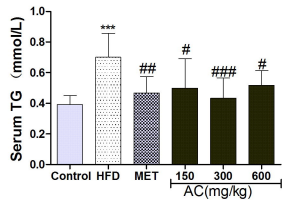**C**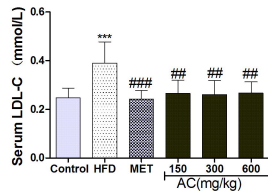**D**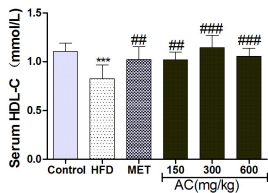**E**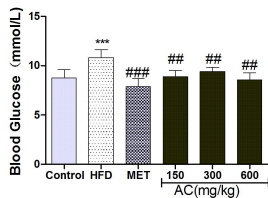**F**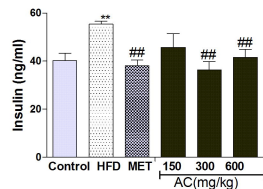**G**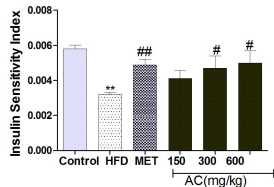**H**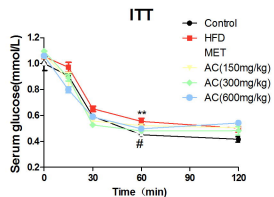**I**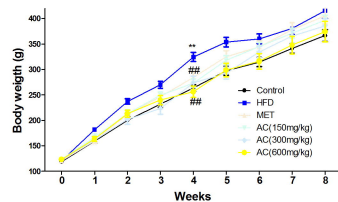

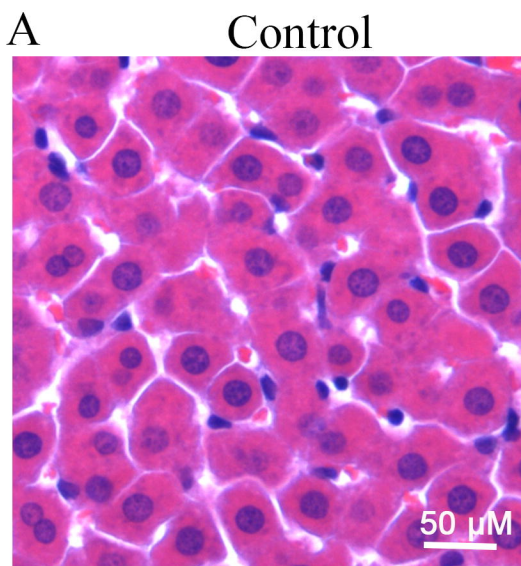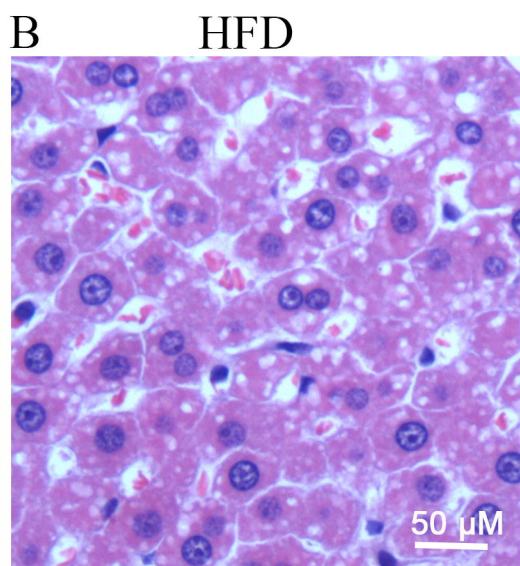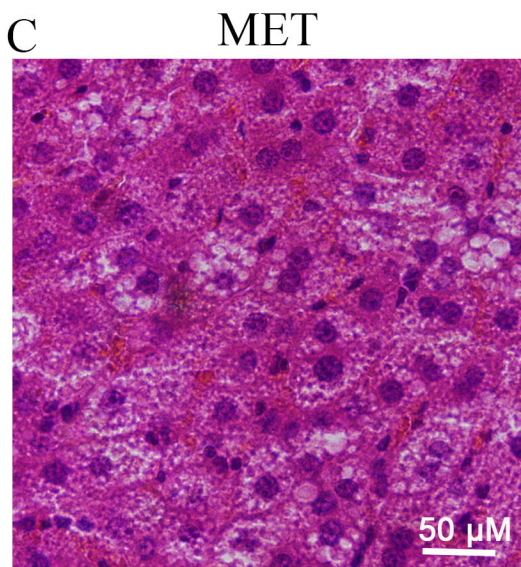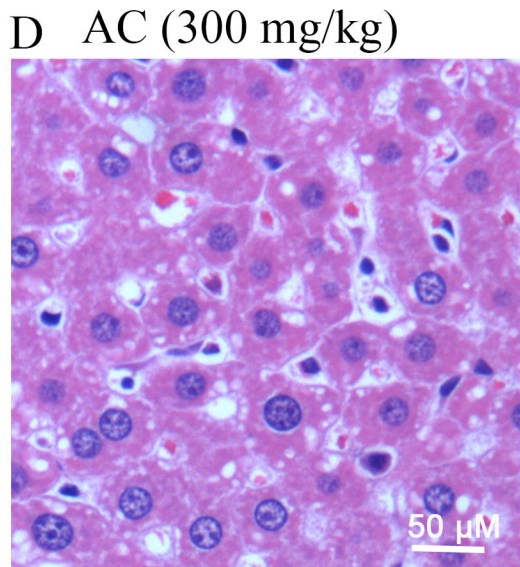

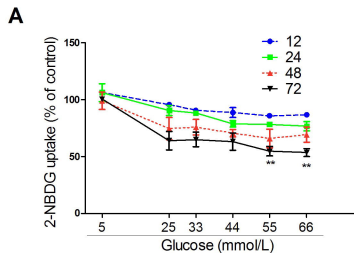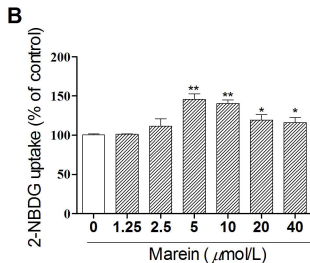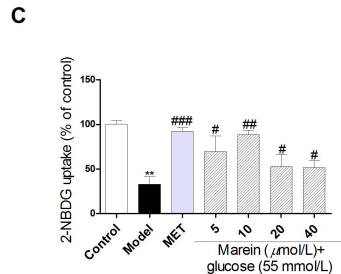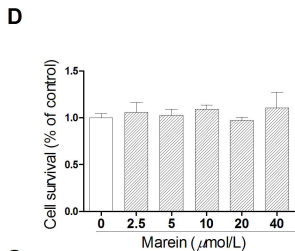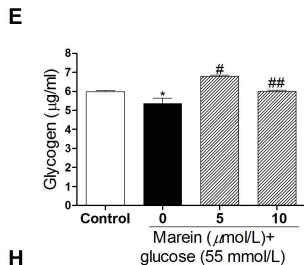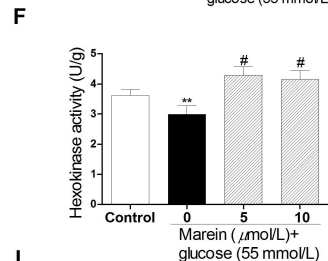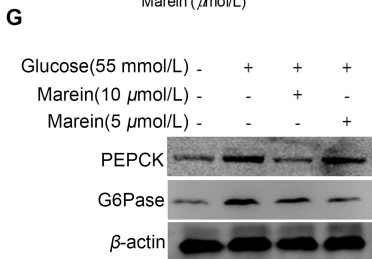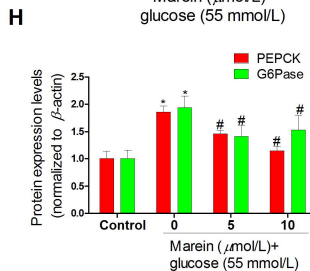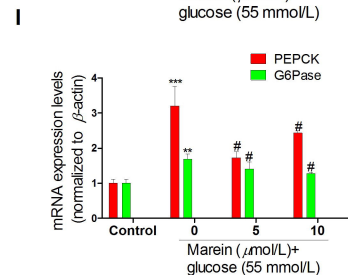

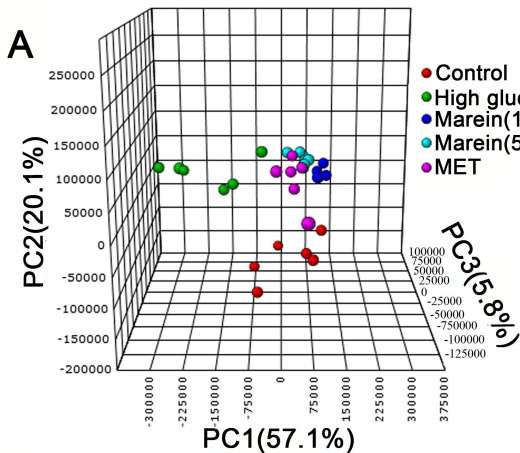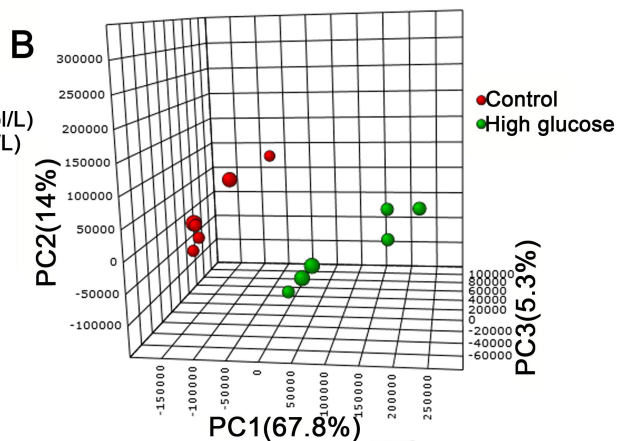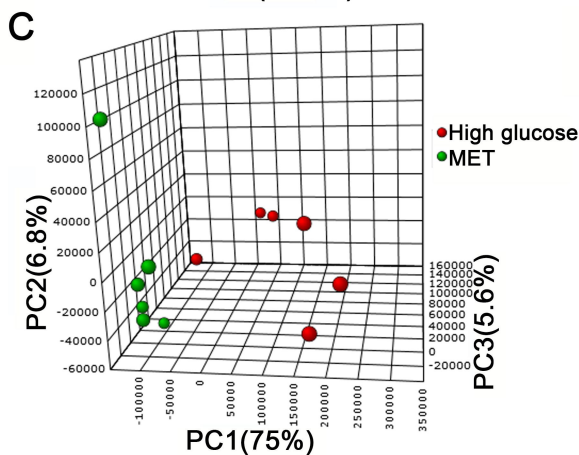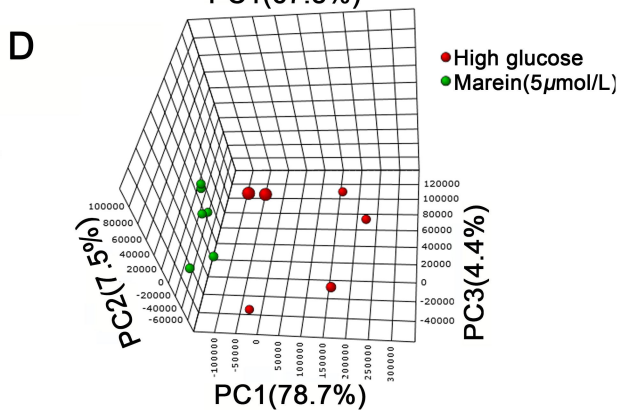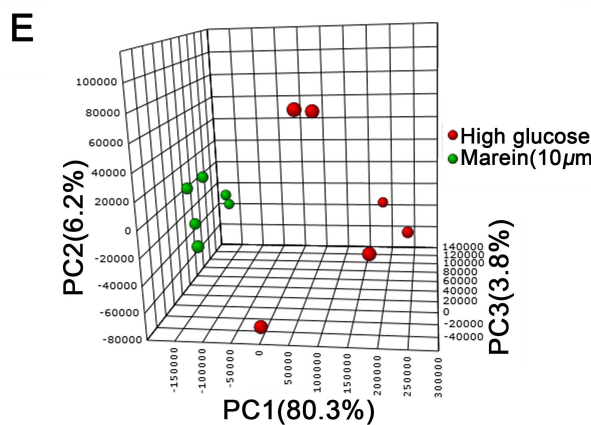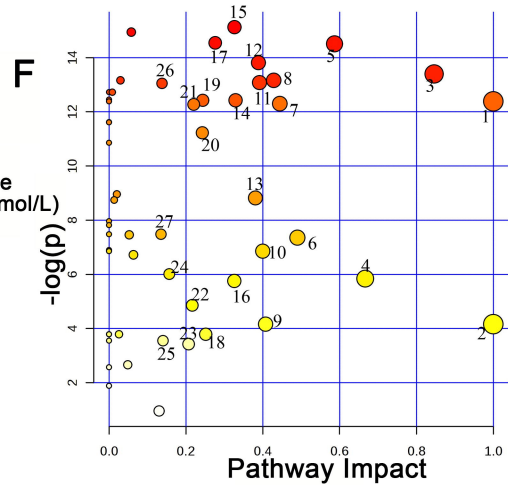



Control     
  High glucose     
  Marein(5  $\mu\text{mol/L}$ )     
  Marein(10  $\mu\text{mol/L}$ )

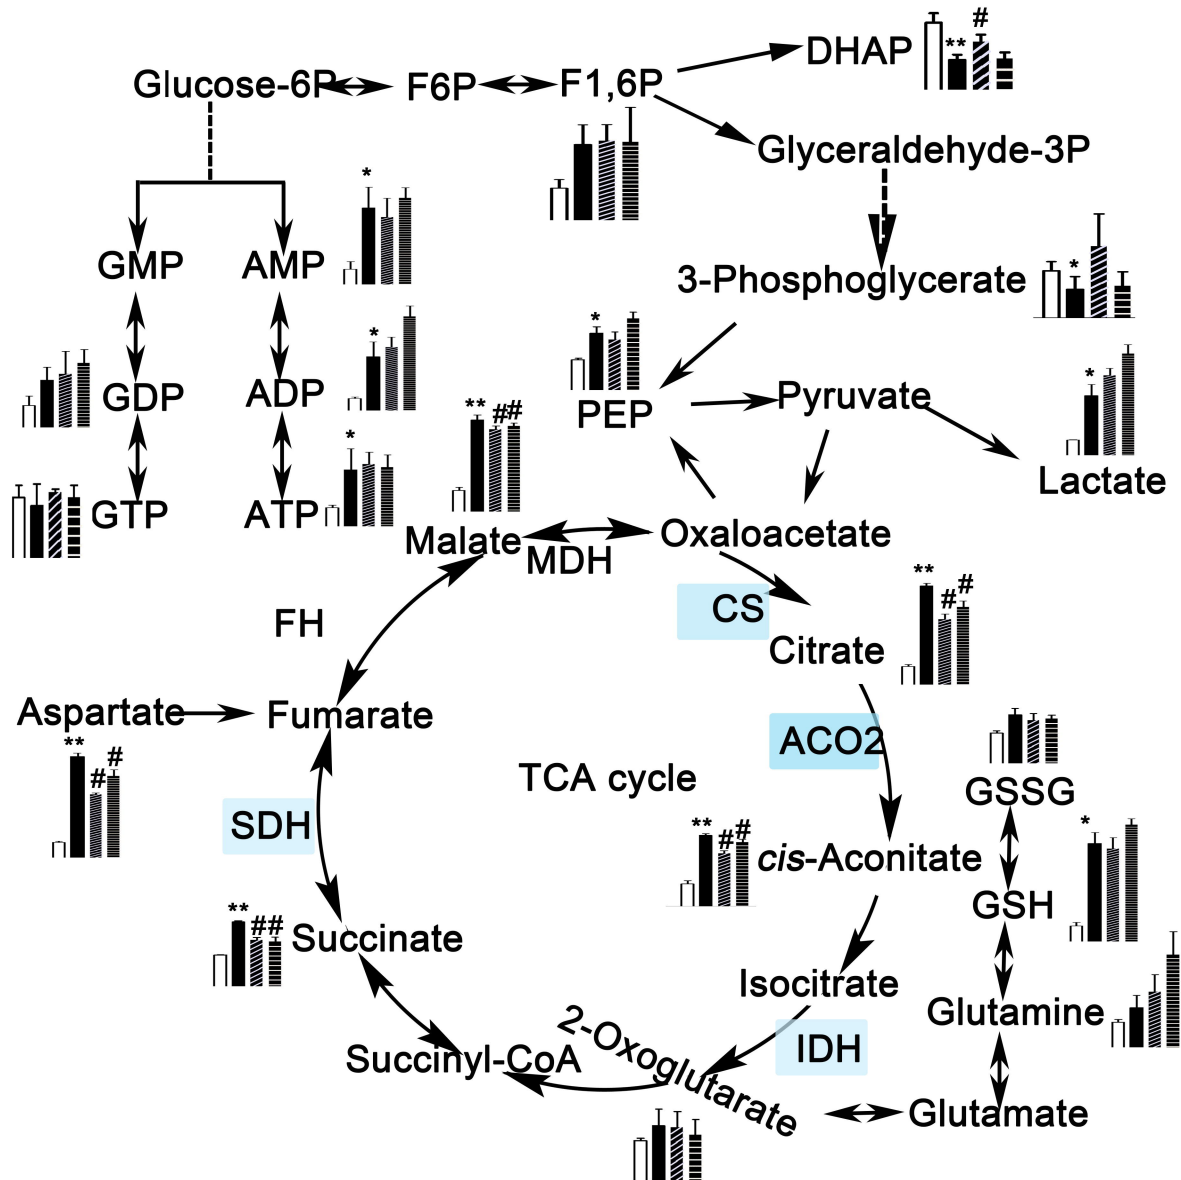



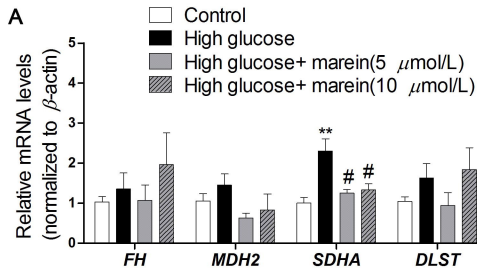

**B**

| Glucose(55mmol/L)      | - | + | + | + |
|------------------------|---|---|---|---|
| Marein(10 $\mu$ mol/L) | - | - | + | - |
| Marein(5 $\mu$ mol/L)  | - | - | - | + |

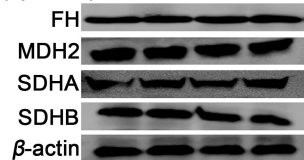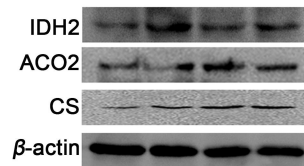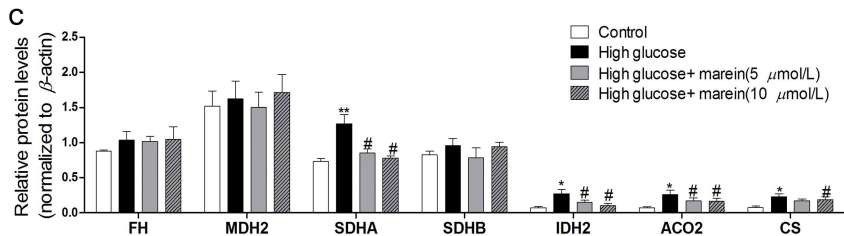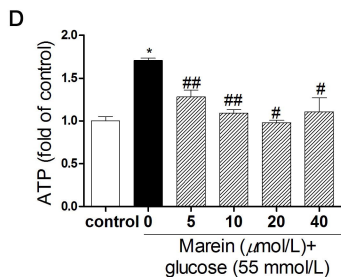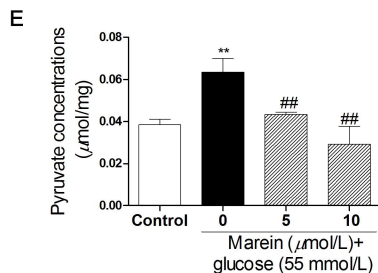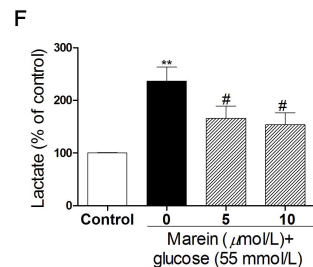

Source: http://www.biorxiv.org/content/10.1101/176495v1.full.pdf
